# Supplementary material for: Two highly sensitive Schiff-base fluorescent indicators for the detection of Zn2+
Source: Royal Society of Chemistry journal article supplement (doi:10.1039/c3ay41691g), 2013-12-09
Supplement: c3ay41691g.pdf [file c3ay41691g.pdf]

## Supplementary material

# Two highly sensitive Schiff-base fluorescent indicators for the detection of Zn<sup>2+</sup>

Lina Wang<sup>a,b</sup>, Wenwu Qin<sup>b</sup>, Weisheng Liu<sup>\*b</sup>

<sup>a</sup> College of Environment and Safety Engineering, Qingdao University of Science and Technology, Qingdao 266042, China.

<sup>b</sup> Key Laboratory of Nonferrous Metal Chemistry and Resources Utilization of Gansu Province and State Key Laboratory of Applied Organic Chemistry, College of Chemistry and Chemical Engineering, Lanzhou University, Lanzhou 730000, P. R. China.

## Contents

|                                                |    |
|------------------------------------------------|----|
| Fig. S1. LOD measurement.....                  | S2 |
| Fig. S2. The solvent response.....             | S3 |
| Fig. S3. <sup>1</sup> H NMR of <b>1</b> .....  | S4 |
| Fig. S4. <sup>13</sup> C NMR of <b>1</b> ..... | S5 |
| Fig. S5. HRMS of <b>1</b> .....                | S6 |
| Fig. S6. <sup>1</sup> H NMR of <b>2</b> .....  | S7 |
| Fig. S7. <sup>13</sup> C NMR of <b>2</b> ..... | S8 |
| Fig. S8. HRMS of <b>1</b> .....                | S9 |

---

\* Corresponding author: E-mail: liuws@lzu.edu.cn

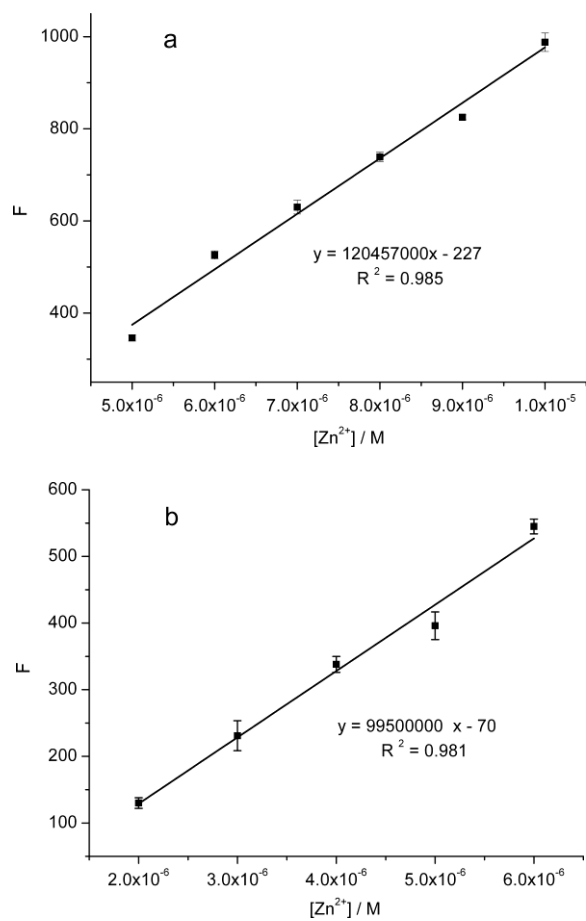

**Fig. S1.** Fluorescence intensity at 483 nm for (a) **1** (30 μM) and (b) **2** (30 μM) in 9:1 (v/v) ethanol-H<sub>2</sub>O (HEPES buffered, pH 7.2) as a function of the concentration of Zn<sup>2+</sup>. The excitation wavelength is 395nm.

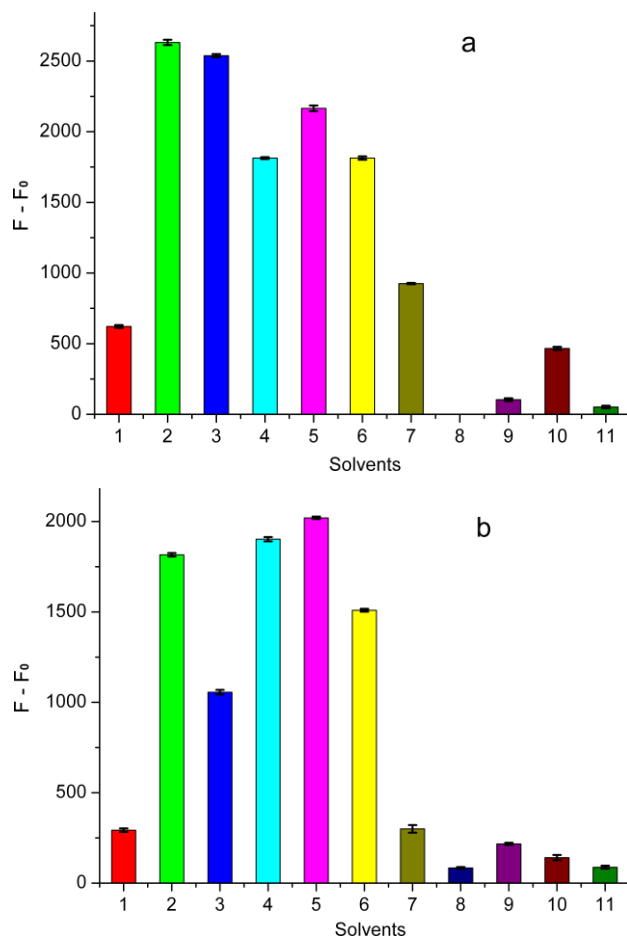

**Fig. S2.** Fluorescence intensity changes of **1** (a) and **2** (b) at 483 nm (30  $\mu$ M) in the absence ( $F_0$ ) and presence ( $F$ ) of 1 equiv of  $Zn^{2+}$  in different solvents. 1-Water; 2-Dimethyl sulfoxide; 3-Acetonitrile; 4-*N,N*-Dimethylformamide; 5-Methanol; 6-Ethanol (pH = 7.2); 7-Acetone; 8-Tetrahydrofuran; 9-Chloroform; 10-Dichloromethane; 11-Toluene.  $\lambda_{ex} = 395$  nm.

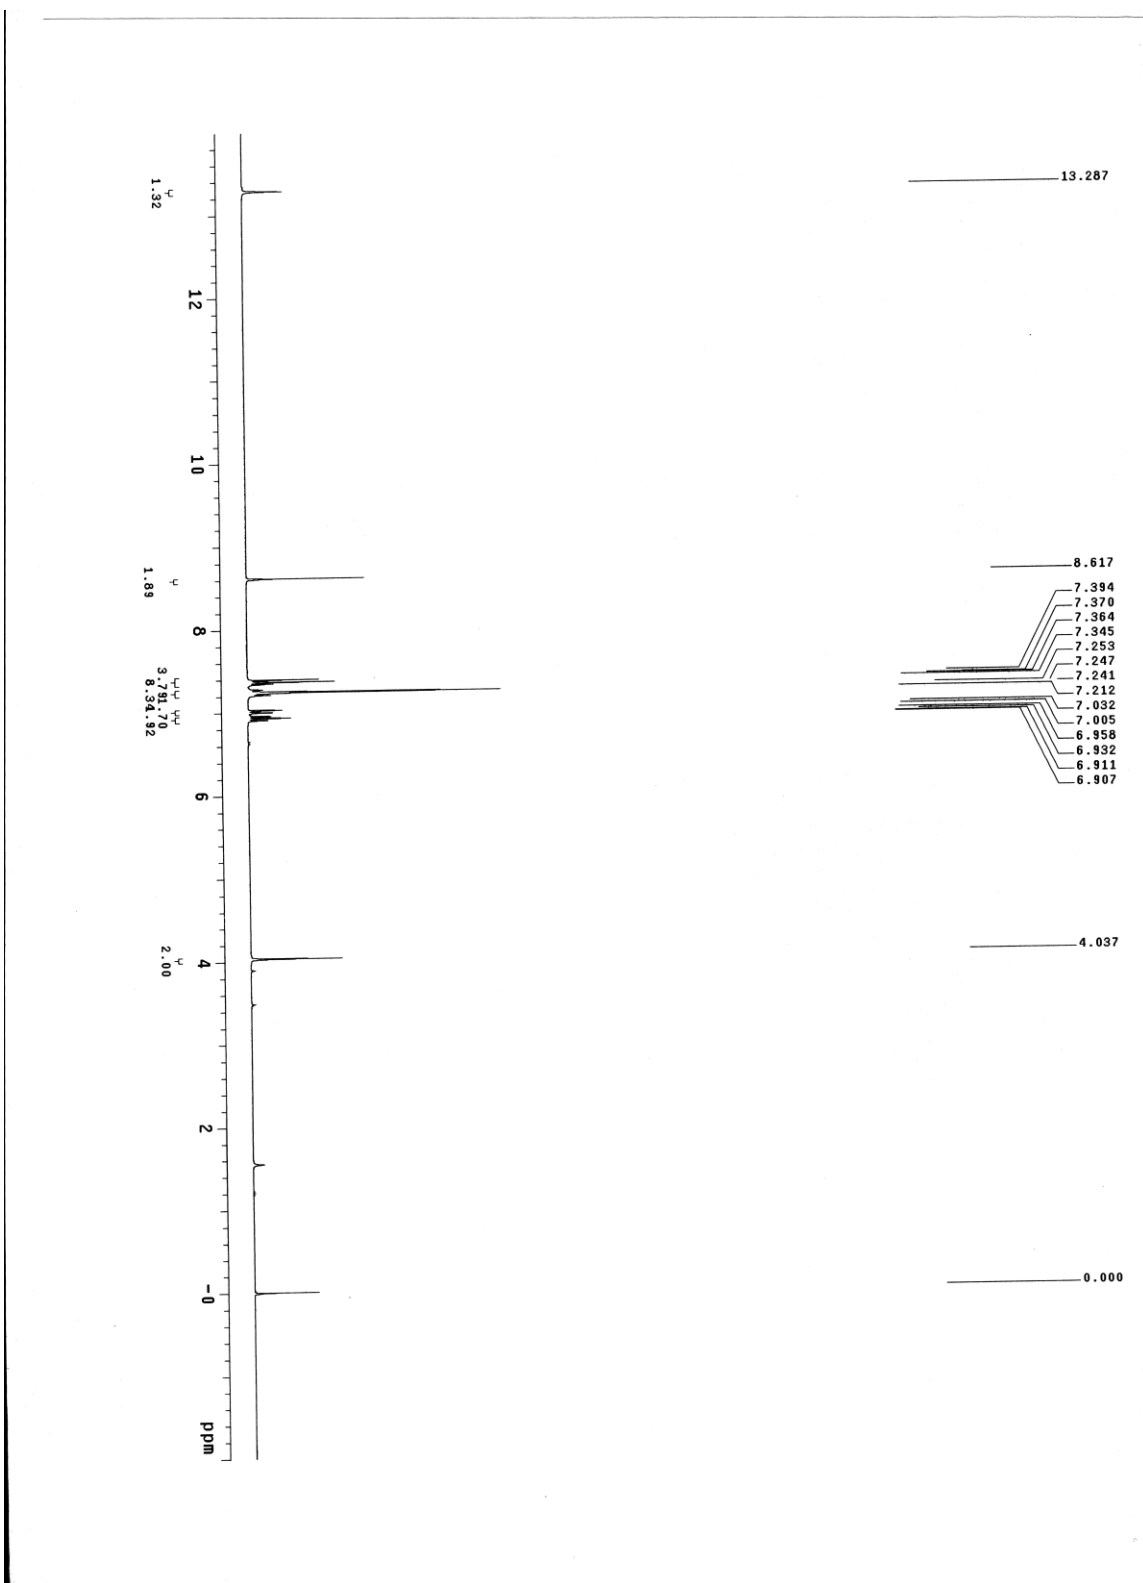

□ Fig. S3.  $^1\text{H}$  NMR of 1

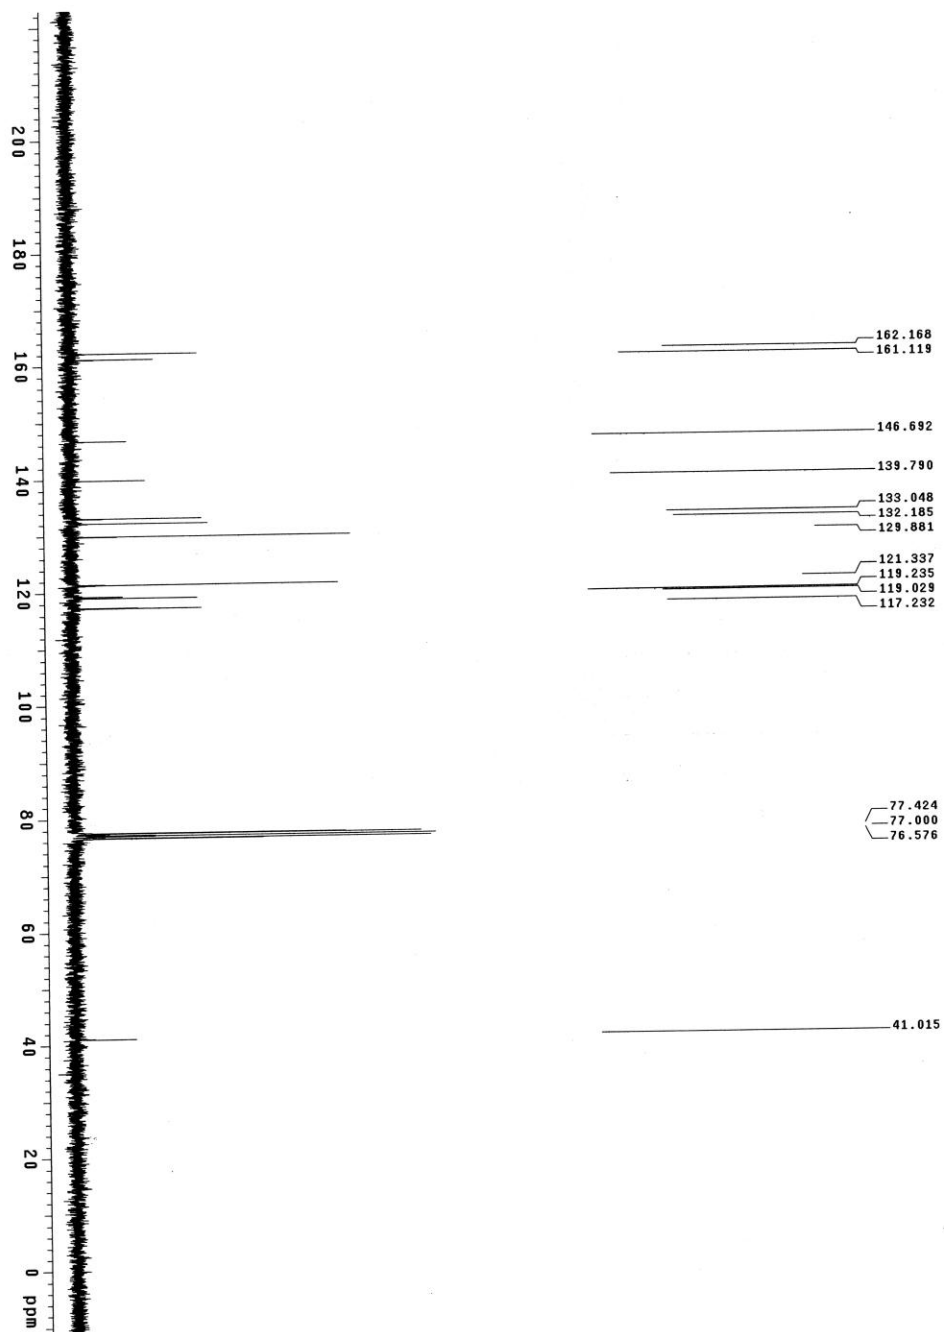

Fig. S4.  $^{13}\text{C}$  NMR of 1

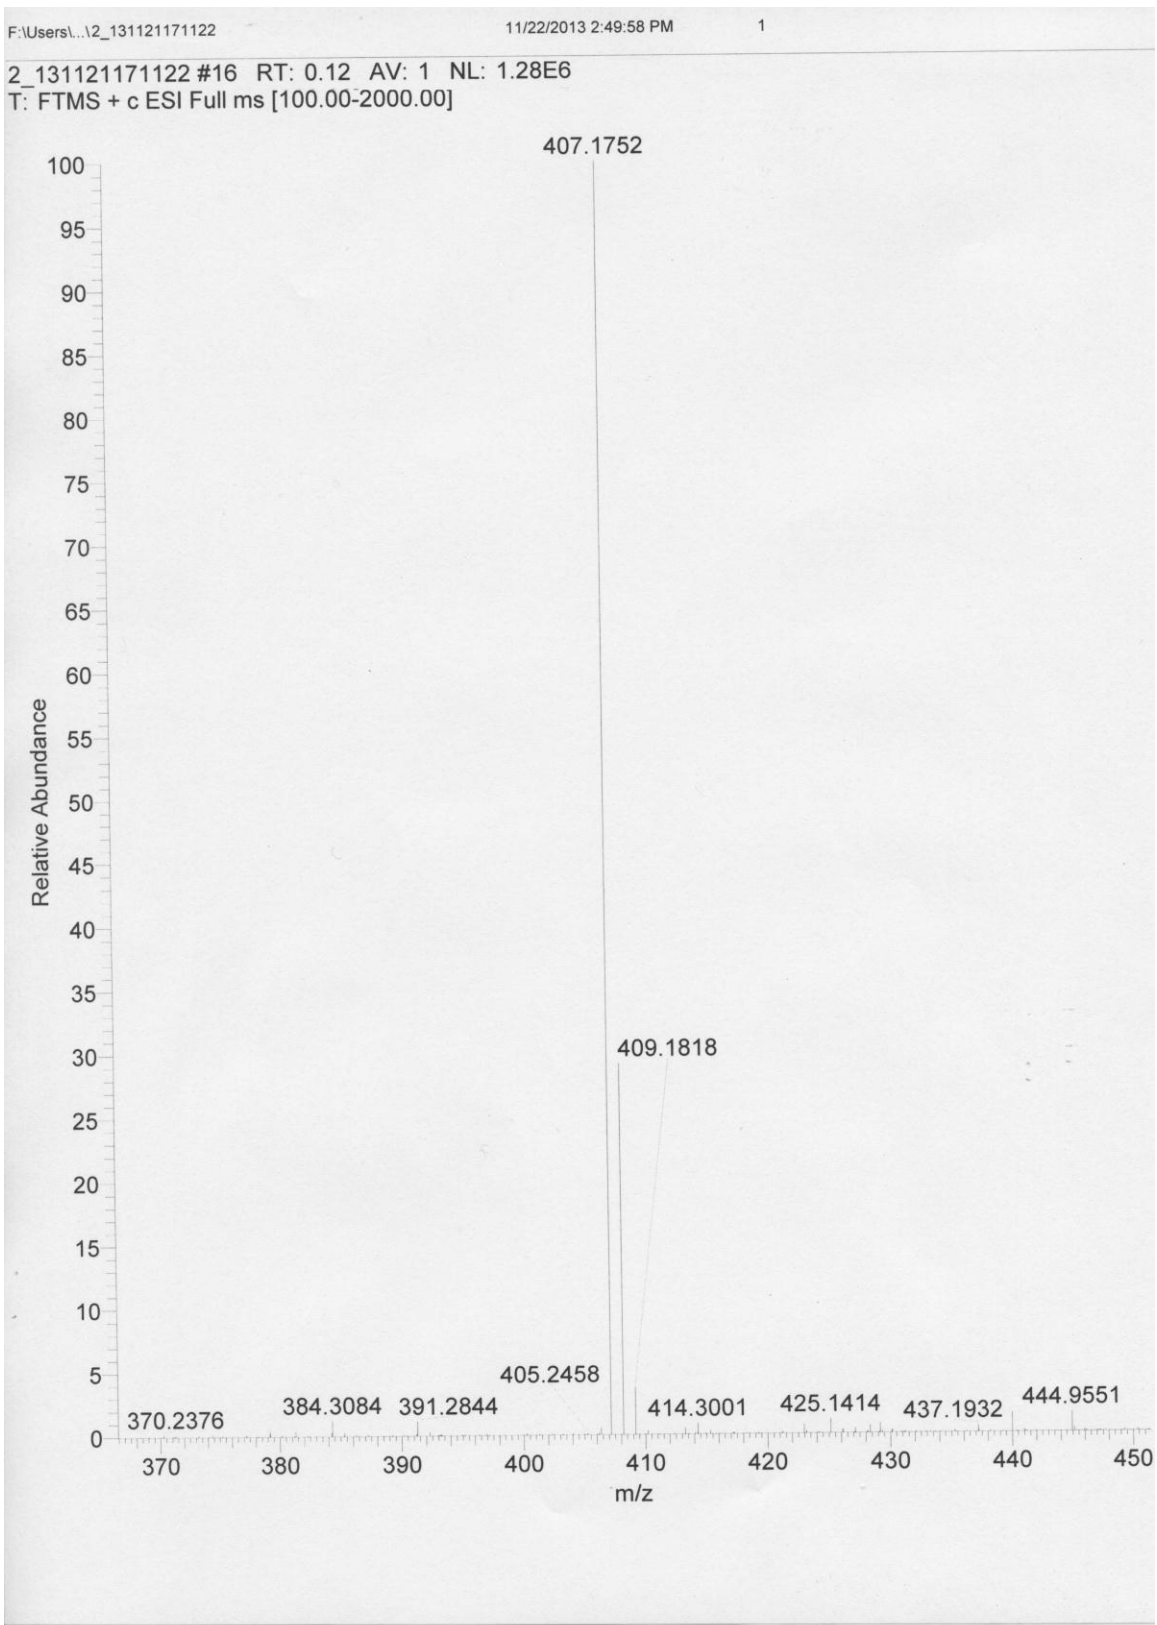

Fig. S5. HRMS of 1

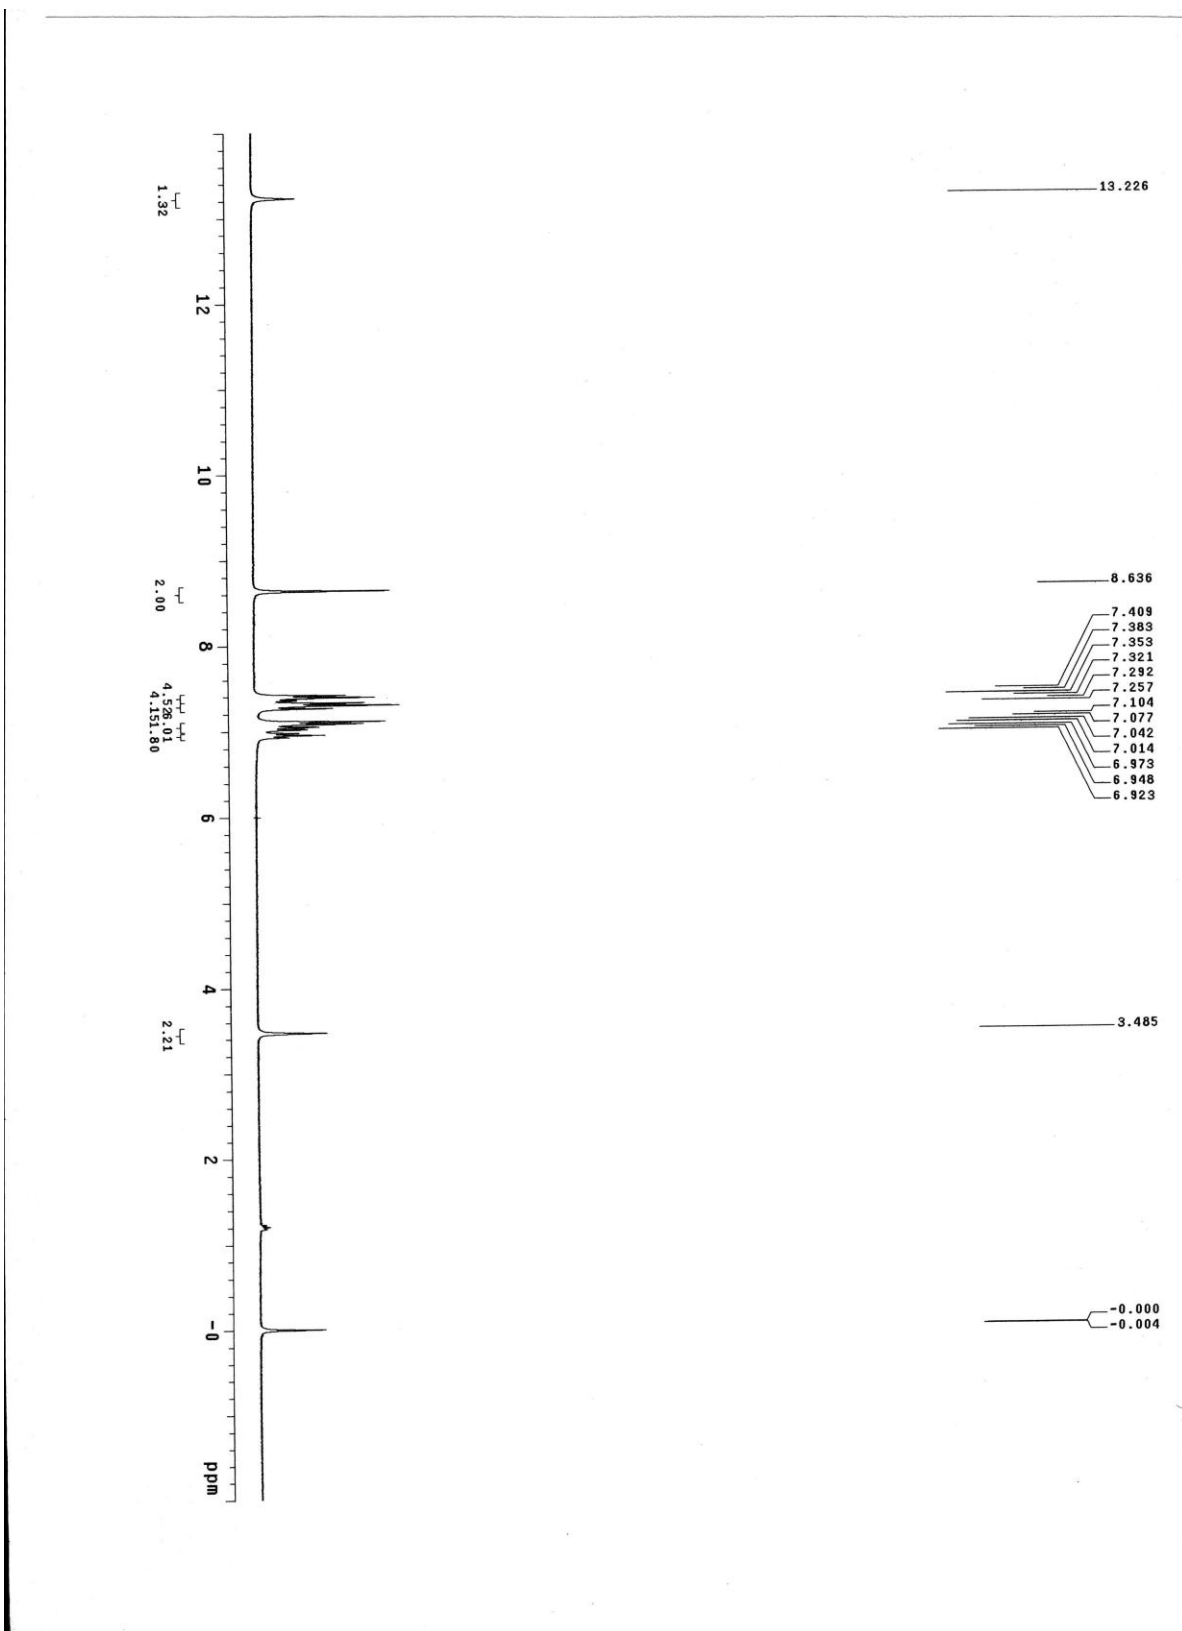

Fig. S6.  $^1\text{H}$  NMR of 2

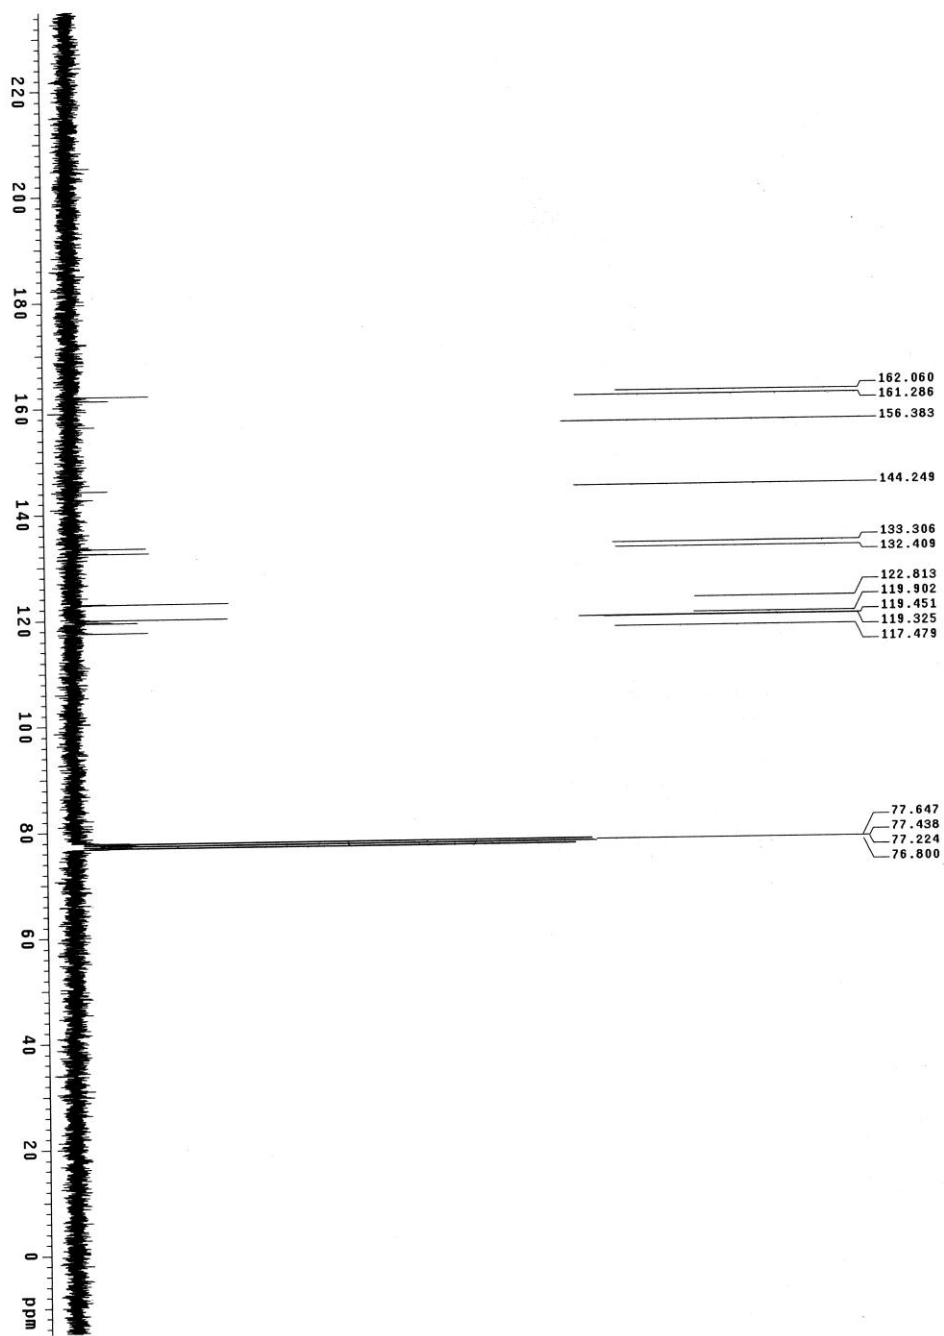

Fig. S7.  $^{13}\text{C}$  NMR of 2



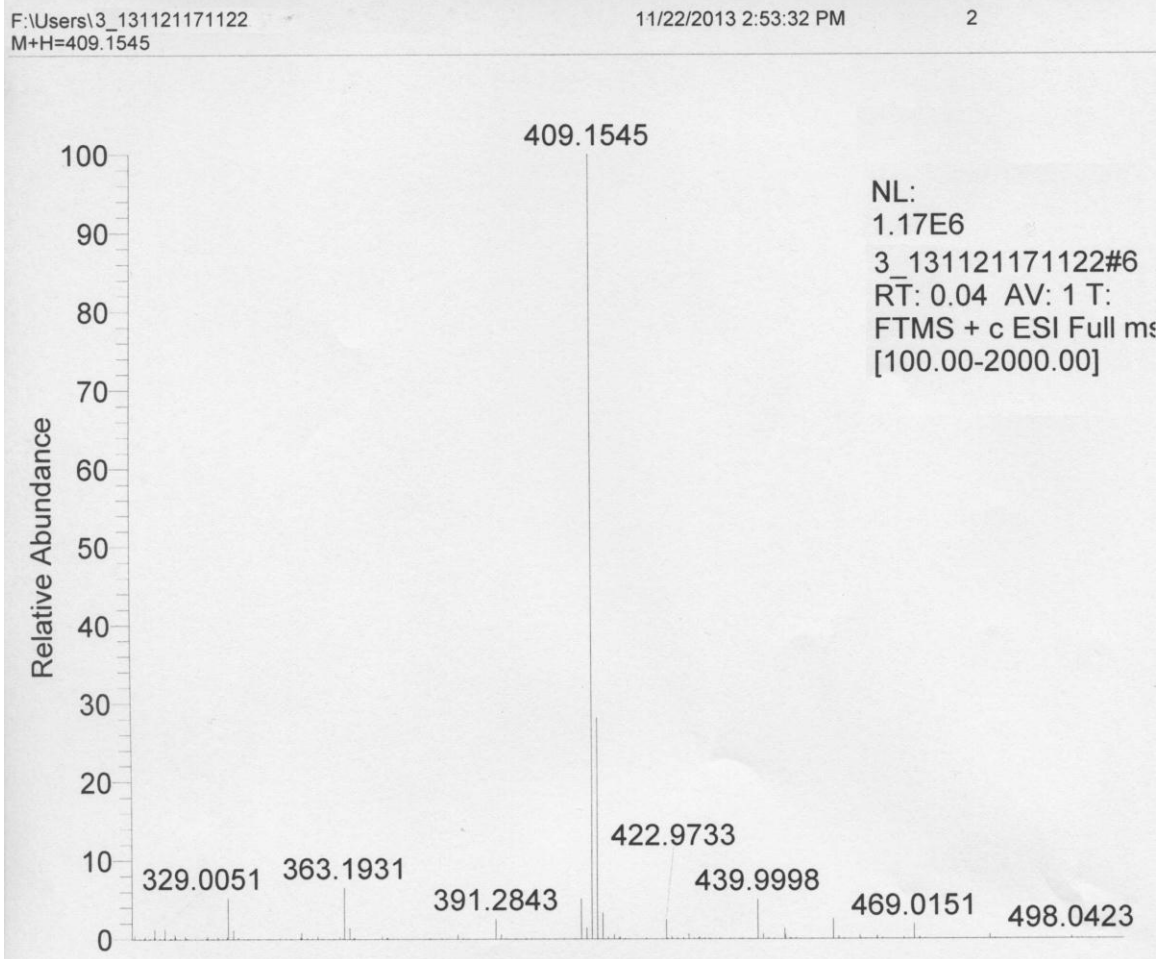

Fig. S8. HRMS of 2
